# Supplementary material for: A stochastic method for asphaltene structure formulation from experimental data: avoidance of implausible structures
Source: Royal Society of Chemistry journal article supplement (doi:10.1039/c6cp06380b), 2017-01-01
Supplement: c6cp06380b1.pdf [file c6cp06380b1.pdf]

**Supplementary Information for:**

**A STOCHASTIC METHOD FOR ASPHALTENE STRUCTURE  
FORMULATION FROM EXPERIMENTAL DATA:  
AVOIDANCE OF IMPLAUSIBLE STRUCTURES**

*JENNIFER DE LEÓN<sup>1\*</sup>, ANA M. VELÁSQUEZ<sup>1</sup> AND BIBIAN A. HOYOS<sup>1</sup>*

<sup>1</sup> Universidad Nacional de Colombia – Sede Medellín, Facultad de Minas, Departamento de Procesos y Energía. Carrera 80 No. 65-223, 050041 Medellín, Colombia

**Accepted structures for the five-ring configuration**

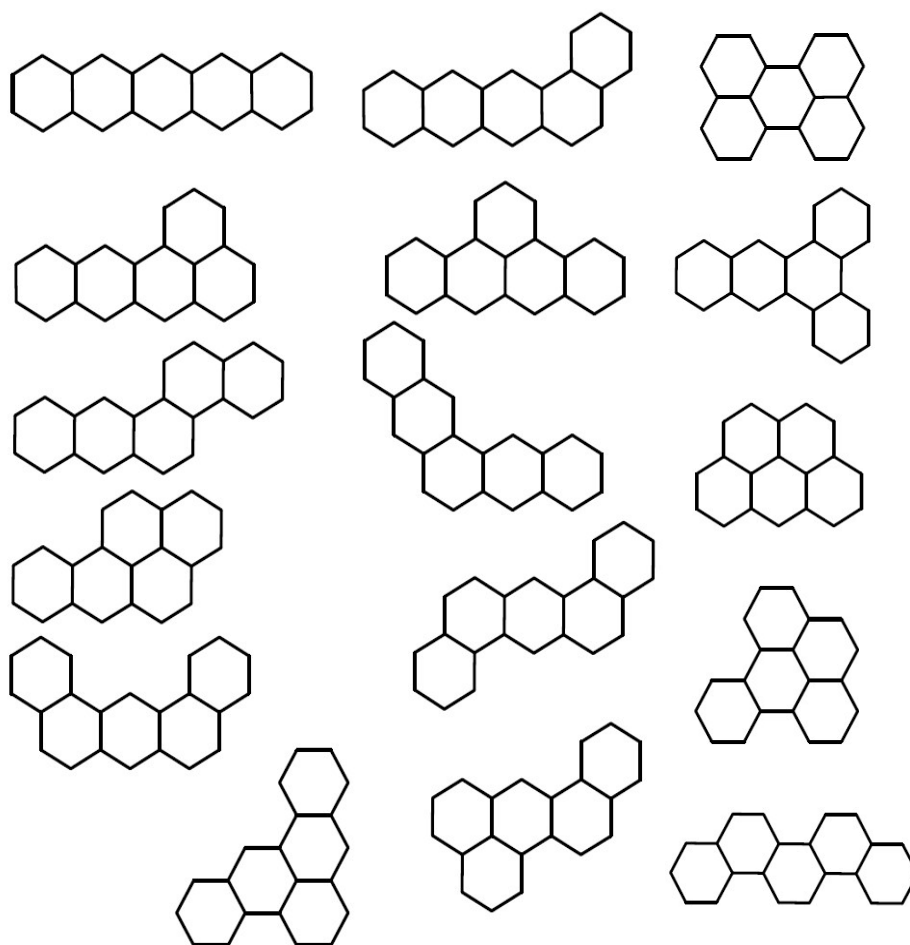

**Figure S1.** Accepted structures for the five-ring configuration.
